# Supplementary material
Source: Research Square preprint supplement (doi:10.21203/rs.3.rs-9874851/v1)
Supplement: Supplementary file 1 [file 2aab370c66876d6036548ec6.docx]

**Supplementary Materials**

**S1 Expanded Methods**

S1.1 DUST VR environment and in-game scoring

S1.2 Biofeedback signal processing and target calibration

S1.3 Detailed behavioural task parameters

S1.3.1 Fearful Avoidance Task (FAT)

S1.3.2 Mental Arithmetic Task (MAT)

S1.3.3 Go/No-Go Task Under Threat (GUNT)

S1.4 Statistical analysis plan

**S2 Preregistered hypotheses (osf.io/b2cvp)**

**S3 Additional hypotheses and follow-up analyses**

**S4 Bayesian mixed-effects model specifications and results**

S4.1 Model specifications

S4.2 Group and session effects

S4.3 Baseline LP-HRV covariate effects

S4.4 Heart rate during transfer tasks

**S5 Supplementary results**

S5.1 Game validation and effectiveness

S5.2 Transfer

S5.2.1 Fearful Avoidance Task (FAT)

S5.2.2 Mental Arithmetic Task (MAT)

S5.2.3 Go/No-Go Under Threat Task (GUNT)

S5.3 Long-term effects

**S6 Missingness and exclusions**

**S1. Expanded Methods**

***S1.1 Expanded description of the DUST VR environment***

*In-game scoring and self-estimates.* After each playthrough, participants received three scores, two represented behavioural performance and one HRV control. Participants provided pre- and post-playthrough self-estimates of their performance on all three dimensions to encourage attention to each.

*Behavioural performance metrics.* Two rates were computed per playthrough: the overall false-alarm rate (proportion of no-go targets shot relative to total no-go targets) and the dispatch-primed false-alarm rate (proportion of no-go targets shot among only those no-go targets whose body description matched the current dispatch). To avoid extreme values and improve model stability, rates were computed with a continuity correction by adding 0.5 to the numerator and 1 to the denominator.

***S1.2 Biofeedback signal processing and target calibration***

*Online artifact correction.* Prior to LP-HRV computation, the IBI series was screened online for artifacts. If two consecutive IBIs differed by more than 250 ms, the later one was replaced by its predecessor, unless one of the three preceding intervals had already been corrected (to prevent cascading corrections). IBIs falling outside the 273–2000 ms range (equivalent to heart rates < 30 bpm or > 220 bpm) were treated as physiologically implausible and replaced by the median of the preceding ten intervals.

*Target calibration and BFB score.* The biofeedback (BFB) score varied continuously in [0, 1] and was derived from the ratio of current LP-HRV to the participant's calibrated target. The initial target for the LP-HRV was set to mean peak-troughs differences of 100 ms but could be adjusted per participant per playthrough to maximize learning—operationalised as ensuring participants received both positive and negative reinforcement, thereby preventing floor or ceiling effects. This gave a final target-range of 50-200 ms. When LP-HRV reached or exceeded the target, the BFB score was clipped to 1 and the FOV was fully open; as LP-HRV fell below the target, the BFB score declined linearly toward 0, with the FOV narrowing proportionally until only zombies directly ahead of the player remained visible.

*Application of the pipeline across the study.* To ensure methodological consistency, the identical LP-HRV processing pipeline (artifact correction, 15-s sliding window, peak-to-trough metric) was applied to every HRV recording in the study, including baseline recordings and recordings made during the behavioural task battery. This ensured that training-induced changes in HRV could be interpreted against a common measurement scale rather than being confounded by differences in signal processing across contexts.

***S1.3 Detailed behavioural task parameters***

**S1.3.1 Fearful Avoidance Task (FAT)**

*Trial structure.* Each trial began with one of two avatars presented together with a monetary cue indicating the potential reward on that trial. Reward magnitudes were defined as proportional deviations (±45–55%) from a €1.35 base value, producing high-reward and low-reward trials. The cue–threat mapping (which avatar signalled threat) was explicitly instructed to the participant before the task began and was counterbalanced across the sample. Participants had 4 s to respond via the up-button (approach) or down-button (avoid).

*Outcomes and contingencies.* Following a response, the avatar depicted the outcome: positive (avatar presenting money), neutral (avatar disappearing), or negative (avatar holding a gun, with the aversive noise burst on threat trials). Approach responses yielded outcomes with probabilities of 40% positive / 20% neutral / 40% negative; avoidance responses yielded 10% / 80% / 10%. Late or missed responses (>4 s) always produced a negative outcome. Outcomes were displayed for 1 s, followed by a fixation cross (3–5 s inter-trial interval).

*Practice and main task.* Participants received explicit instructions and completed eight practice trials to verify comprehension, followed by 40 experimental trials (10 per cell of the 2 × 2 threat × reward design). For analysis, responses were categorised by the four trial types and the proportion of avoidance decisions and mean reaction time within the response window were computed per type.

*Preregistered exclusion.* Following prior work and our preregistration, one participant in the biofeedback group was excluded for atypical response patterns indicating misunderstanding of the task contingencies (see Supplement S6).

**S1.3.2 Mental Arithmetic Task (MAT)**

*Pacing and stressors.* Each participant was assigned a random starting value in the range 696–705 and counted backwards aloud in steps of seven, paced by a recurring 2000 Hz, 160-ms tone presented every second. The starting number was displayed for 5 s before an on-screen "START" cue appeared. The experimenter monitored performance and triggered an on-screen "ERROR!" cue together with a strident tone via a mouse-click after each error; participants restarted from the starting number on each error. If a participant fell behind the pacing tone they were instructed to speed up. Participants were led to believe they were being video-recorded via an inactive camera, to heighten social-evaluative threat. The task ended after 5 min with an on-screen "STOP!" cue.

*Scoring.* Performance was operationalised as the highest number of consecutive correct subtractions within the 5-min block. To better entangle training efficacy, variability induced by baseline performance and experimenter noise was removed. This was achieved by z-transforming raw counts within group. This removed pre-existing between-group differences at baseline while preserving within-subject change across sessions.

*State anxiety.* State anxiety was measured immediately before and immediately after the task using the State Anxiety Inventory (STAI-S); pre-to-post difference scores indexed task-induced anxiety.

**S1.3.3 Go/No-Go Task Under Threat (GUNT)**

*Trial structure.* Each trial began with one of two randomly selected opponents (the cue): one signalling threat, the other safety; cue–threat mapping was counterbalanced across participants. After a preparation period uniformly sampled from 500–6500 ms, the opponent drew either a gun (go trial) or a mobile phone (no-go trial). Armed opponents fired after a brief delay, defining a 500 ms response window within which participants had to shoot the opponent before being fired upon.

*Outcomes and punishment.* Participants responding too slowly were shot by the opponent; premature responses or false alarms resulted in being shot by a background policeman. Only erroneous responses under high-threat cues were followed by the aversive auditory stimulus (50 ms, ~95 dBA white-noise burst).

*Deviations from the original paradigm.* Three changes were made relative to the original GUNT. (i) A fixed response window replaced the original adaptive titration, as the task here served as a brief pre–post outcome measure in which variation in reaction time and accuracy — rather than task difficulty calibration — was of primary interest. (ii) An aversive auditory stimulus replaced the original electric shock, for consistency with the FAT and to maintain a uniform aversive modality across the battery. (iii) Heart rate was indexed at the task level rather than trial-by-trial with the primary research goal being overall assessment of HR(V) during task performance and it’s impact.

*Outcome variables.* False-alarm rate on no-go trials and mean reaction time on correct go trials were computed separately for threat and safe contexts.

**S1.4 Detailed statistical analysis plan**

This section details the statistical models used for each of the three study objectives. The general modelling framework (software, families, random-effects structure, covariates, and decision rules) is described in the main-text Data analysis section. Here we describe the specific models used under each objective. A compact tabular overview of every model, listing outcome, task or context, fixed- and random-effect structure, and family, is provided in S4.1.

***Objective 1: Game validation***

First, we assessed whether the training successfully elicited the intended behaviour and intended levels of arousal and engagement. To this end, average heart rate across all playthroughs of the biofeedback group was compared to baseline heart rate using a Student’s *t*-test. To evaluate subjective experience, we tested whether engagement ratings exceeded the scale midpoint (4; “somewhat true”) at each measurement point and whether willingness to replay the game at home differed from the neutral midpoint post-training and at the 1-week and 1-month follow-ups, using Bonferroni-adjusted one-sample *t*-tests. Finally, to examine whether our priming influenced behavioural responding during gameplay, paired-samples *t*-tests compared primed versus unprimed conditions on sensitivity (*d′*) and response criterion (*c*), indexing discrimination performance and response bias, respectively.

Secondly, we examined whether the training enhanced autonomic regulation through biofeedback. To assess learning across the protocol, we fitted a Bayesian mixed-effects model (BMM) including all four training sessions (each comprising two playthroughs) and their interaction to test changes in in-game LP-HRV over time. We then examined the overall effect of training using two additional BMMs: one comparing the first and final playthrough (P1 vs P8) and one comparing the first playthrough with the final non-biofeedback playthrough (P1 vs P7). To explore whether baseline autonomic regulation moderated learning, an additional BMM included baseline LP-HRV as an interaction term. Changes in self-reported interoceptive awareness of breathing and heart rate were assessed with two BMMs comparing P1 and P8. Finally, behavioural changes were evaluated with two BMMs comparing P1 and P7 for overall false-alarm rates and dispatch-primed false-alarm rates.

***Objective 2: Transfer***

Transfer of HRV regulation to the outside VR context was assessed using Bayesian mixed-effects models (BMMs). Three separate BMMs examined group-level differences in LP-HRV from baseline to the transfer session across the behavioural tasks, and analogous models were fitted to assess group-level differences in heart rate (HR) across time. To examine whether training-related LP-HRV improvements were associated with transfer effects, Pearson correlations were computed between task-related LP-HRV change and VR- training LP-HRV progression, defined as the increase in LP-HRV from the first to last playthrough. To account for baseline LP-HRV influences, baseline-corrected correlations were calculated by regressing both variables on baseline measurements and correlating the resulting residuals. Behavioural transfer effects were analysed separately per task. In the FAT, a BMM including threat and reward was fitted to examine whether their main effects and interaction on avoidance behaviour differed between groups from baseline to transfer. In the MAT, performance improvements were assessed using a BMM comparing group-level changes from baseline to transfer. Changes in pre- to post-task anxiety were analysed using a BMM including both STAI measurements per session to assess group-level differences over time. Finally, in the GUNT, BMMs were used to examine whether threat context induced higher false alarm rates and faster reaction times, and whether these effects showed group-level differences from baseline to transfer.

***Objective 3: Long-term effects training***

Self-reported stress regulation and breathing awareness were first analysed in the biofeedback group on the Likert scales using two Bayesian mixed-effects models (BMMs) across four measurement points (baseline, transfer session, 1-week follow-up, and 1-month follow-up) to characterise the magnitude and durability of perceived training effects. Between-group differences were subsequently evaluated at the end of the transfer session using independent-samples *t*-tests, as control-group follow-up data were unavailable. Finally, within the biofeedback group, the binary (yes/no) items assessing whether the training improved daily stress regulation and breathing awareness were analysed at the transfer session and at the 1-week and 1-month follow-ups using Bonferroni-adjusted one-sample proportion tests.

**S2: Preregistered hypotheses**

Overview of all preregistered hypotheses (https://osf.io/b2cvp), including whether each hypothesis was supported and the primary test statistic used for evaluation. For hypotheses tested using Bayesian mixed-effects models, detailed model specifications are reported in the following section.

**Supplementary Table 2** | Preregistered hypotheses, outcomes, and primary test statistics

| Hypothesis | Confirmed | Test-statistic |
| --- | --- | --- |
| H1: There is an increase in absolute training-induced improvement in LP-HRV, which will be reflected as an effect of time on LP-HRV from the first playthrough without biofeedback to the last playthrough without biofeedback in the experimental group. | Yes | *BP7_vs_P1* = 10.72, 99.9% CrI [2.66, 19.74]), |
| H2a: There is an improvement in interoceptive awareness of heart rate from the first to the last playthrough | Yes | *B*P8_vs_P1 = 1.25, 99.9% CRI [0.50, 2.05] |
| H2b: There is an improvement in interoceptive awareness of breathing from the first to the last playthrough | Yes | *B*P8_vs_P1 = 2.99, 99.9% CRI [1.89, 4.56] |
| H3a: In line with earlier work (Michela et al., 2022) we expect an improvement in in-game performance in the experimental group reflected by a reduction in false-alarm hits from the first (playthrough 1) to the last playthrough without biofeedback (playthrough 7). | Yes | *B*P7_vs_P1 = 0.25, 99.9% CrI [0.05, 0.46] |
| H3b: Dispatch-primed FA is expected to remain stable between these playthroughs in line with earlier findings (Michela et al., 2022). | Yes, trend-level | *B*P7_vs_P1 = 0.17, 90% CrI [0.02, 0.31] |
| H4: We hypothesize that engagement levels in both the control and experimental groups will be significantly positive. Furthermore, we expect this elevated engagement to persist across all four measurements in the experimental group. | Yes | *t*P2(55) = 15.21, *p* < .001; *t*P4(54) = 16.53, *p* < .001; *t*P6(51) = 18.69, *p* < .001; tP8(50) = 18.01, *p* < .001 |
| H5: We hypothesize that participants in the experimental group would like to replay the game if it were present at home. | Yes | *t*P8(51) = 12.17, *p* < .001; *t*FU1(48) = 11.84, *p* < .001; *t*FU2(48) = 13.59, *p* < .001 |
| H6: We hypothesize that the experimental group will show a group-level higher level of ability to regulate their stress in daily life when stressed, immediately post-training. | No | *t*(100) = −1.04, *p* = .302 |
| H7: We hypothesize that the experimental group will show a group-level higher breathing awareness in daily life, immediately post-training. | No | *t*(100) = −0.30, *p* = .764 |
| H8a: There is a larger increase over time (pre-to post) in LP-HRV during the tasks in the experimental group than in the control group. (FAT) | Yes | *Bgroup x session* = -17.22, 99.9% CrI [-26.37 -7.69] |
| H8b: There is a larger increase over time (pre-to post) in LP-HRV during the tasks in the experimental group than in the control group. (MAT) | Yes, trend-level | *Bgroup* x session = -2.74, 90% CrI [-5.40, -0.08] |
| H8c: There is a larger increase over time (pre-to post) in HRV during the tasks in the experimental group than in the control group. (GUNT) | Yes | *Bgroup x session* = -11.59, 99.9% CrI [-19.60, -2.73] |
| H9: Our primary hypothesis is that the experimental group will exhibit less costly avoidance during the fat after the HRV-BF training. This will be evidenced by a higher proportion of avoidance decisions post-training in the experimental group compared to the control group. | Yes | *Bgroup x session* = −0.14, 95% CrI [−0.27, −0.01] |
| H10a: The experimental group will exhibit lower scores on the State Anxiety Inventory (STAI-S) after the HRV-BF training. This will be evidenced by lower group-level differences in the pre-to-post STAI-S scores. | No | *Bgroup x session* = -0.36, 90% CrI = [-0.96, 0.26] |
| H10b: We expect that both groups show an improvement in task performance on the MAT, reflected in a higher task score, from pre-to post measurement. In addition, we expect that this improvement is larger in the experimental group as evidenced by a two-way interaction between group and time. | Yes | *Bgroup x session* = -0.23, 95% CrI [-0.39, -0.08] |
| H10c: We expect that the experimental group will show reduced arousal during the task post HRVBF training reflected in group-level differences in heart rate evidenced by a two-way group and time interaction. | Partly, trend-level | *Bgroup* x session = 0.90, 90% CrI = [0.05, 1.74] |
| H11a: The experimental group will exhibit better impulse control in the GUNT post-HRV-BF training compared to the control group, indicated by fewer false alarms on no-go trials, especially in the threat condition. | No | *Bgroup x session* = 0.00, 90% CrI = [-0.08 0.08] |
| H11b: The experimental group is expected to show a reduction in reaction times on Go trials post-HRV-BF training, compared to the control group. | No | *Bgroup x session* = -0.10, 90% CrI = [-1.37 1.21] |
| H12a: We expect that participants will indicate that the training has helped them improve their stress regulation. Both after training and during the two follow-up measurements. | Yes | post: 71.2% yes, *p*adj = .010; FU1: 69.4% yes, *p*adj = .028; FU2: 73.5% yes, *p*adj = .004 |
| H12b: We expect that participants will indicate that the training has helped them improve their breathing awareness. Both after training and during the two follow-up measurements. | Yes | post: 92.3% yes, *p*adj < .001; FU1: 79.6% yes, *p*adj < .001; FU2: 75.5% yes, *p*adj = .001 |
| H13a: We anticipate that participants will report an improvement in their ability to regulate stress in daily life after completion of the training in comparison to prior to training. We expect this effect to persist in follow-up measurements. | Yes | One week: OR = 0.33, 99% CrI [0.09, 0.82],  One month: OR = 0.55, 90% CrI [0.24 0.95]  Contrast 1-week vs 1-month: OR = 1.68 90% CrI [0.70 2.99] |
| H13b: We anticipate that participants will report an improvement in their breathing awareness in daily life after completion of the training in comparison to prior to training. We expect this effect to persist in follow-up measurements. | Yes | One week: OR = 0.37, 99% CrI [0.12, 0.92]  One month: (OR = 0.57, 90% CrI [0.24, 1.00] |

*Note.* CrI = credible interval. OR = odds ratio. FAT = Fearful Avoidance Task; MAT = Mental Arithmetic Task; GUNT = Go/NoGo Under Threat.

**S3: Additional hypotheses and follow-up analyses**

Hypotheses that were not included in the preregistration and were tested to further disentangle or corroborate the hypothesized effects.

**Supplementary Table 3** | Additional (non-preregistered) hypotheses, outcomes, and primary test statistics

| Hypothesis | Confirmed | Test-statistic |
| --- | --- | --- |
| PH1: Participants would show significantly higher arousal during the VR-training compared to baseline measured through HR. | Yes | *t*(48) = 7.36, *p* < .001 |
| PH2: LP-HRV is significantly higher in playthroughs with the presentation than in playthroughs without the biofeedback. | Yes | *Bbiofeedback* = -8.57, 99.9% CrI [-11.70 -5.37] |
| PH3: Baseline levels of LP-HRV would significantly predict the improvement in LP-HRV over training | Yes | *Bbaseline* x P7_vs_P1 = 6.74, 99% CrI [0.01, 13.56] |
| PH4a: Individuals with larger LP-HRV improvement during training would also predict LP-HRV improvements during the transfer tasks, even when correction for baseline levels of LP-HRV: FAT | Yes | *r* = 0.44, *p* = .006 |
| PH4b: Individuals with larger LP-HRV improvement during training would also predict LP-HRV improvements during the transfer tasks, even when correction for baseline levels of LP-HRV: MAT | Yes | *r* = 0.43, *p* = .005 |
| PH4c: Individuals with larger LP-HRV improvement during training would also predict LP-HRV improvements during the transfer tasks, even when correction for baseline levels of LP-HRV: GUNT | Yes | *r* = 0.53, < .001 |
| PH5a: Transfer effects of LP-HRV in the biofeedback group during the FAT are not driven by general reductions in arousal as measured by significant reductions in HR compared to the control group | Yes | *Bgroup×session*= 0.33, 90% CrI [−0.51, 1.14] |
| PH5a: Transfer effects of LP-HRV in the biofeedback group during the GUNT are not driven by general reductions in arousal as measured by significant reductions in HR compared to the control group | Yes | *Bgroup x session* = -0.05, 95% CrI [-0.82, 0.70] |

**S4. Bayesian mixed-effects model specifications and results**

***S4.1: Model specifications***

Detailed overview of all Bayesian mixed-effects models employed in the present study. These models correspond to the hypotheses specified in the preceding hypotheses tables.

**Supplementary Table 4.1** | Specification of all Bayesian mixed-effects models

| Hypothesis | Outcome measure | Task/measure | Fixed effects | Random effects | Family |
| --- | --- | --- | --- | --- | --- |
| *H1* | VR LP-HRV | VR training | Playthrough1,7 + Age + Gender + Weekly exercise + Baseline LP-HRV | (1 + Subject) | Gaussian |
| *H2a* | IA scores heart rate | Self-report | Playthrough1,8 | (1 + Subject) | Logit |
| *H2b* | IA scores breathing | Self-report | Playthrough1,8 | (1 + Subject) | Logit |
| *H3a* | FA-rate overall | VR-training | Playthrough1,7 | (1 + Subject) | Binomial |
| *H3b* | FA-rate dispatch-primed | VR-training | Playthrough1,7 | (1 + Subject) | Binomial |
| *H8a* | LP-HRV during FAT | FAT | Group x Session + Age + Gender + Weekly exercise + Baseline LP-HRV | (1 + Subject) | Gaussian |
| *H8b* | LP-HRV during MAT | MAT | Group x Session + Age + Gender + Weekly exercise + Baseline LP-HRV | (1 + Subject) | Gaussian |
| *H8c* | LP-HRV during GUNT | GUNT | Group x Session + Age + Gender + Weekly exercise + Baseline LP-HRV | (1 + Subject) | Gaussian |
| *H9* | Proportion of avoidance decisions | FAT | Group x Session x Reward x Threat | (1 + Session * Reward + Session * Threat + Reward * Threat | Subject) | Binomial |
| *H10a* | STAI-s scores | MAT | Group * Session * Measurement | (1 + Session + Measurement | Subject) | Gaussian |
| *H10b* | Performance scores MAT | MAT | Group * Session | (1 + Subject) | Gaussian |
| *H10c* | HR during MAT | MAT | Group * Session | (1 + Subject) | Gaussian |
| *H11a* | Proportion of false alarms | GUNT | Group * Session * Threat | (1 + Session + Threat | Subject) | Binomial |
| *H11b* | Reaction time (RT) | GUNT | Group * Session * Threat | (1 + Session + Threat | Subject) | Gaussian |
| *H13a* | Likert scale stress regulation | Self-report | Measurement | (1 + Subject) | Logit |
| *H13b* | Likert scale breathing awareness | Self-report | Measurement | (1 + Subject) | Logit |
| *PH2* | VR LP-HRV | VR training | Session * Biofeedback + Age + Gender + Weekly exercise + Baseline LP-HRV |  | Gaussian |
| *PH3* | VR LP-HRV | VR training | Playthrough1,7 * Baseline LP-HRV + Age + Gender + Weekly exercise | (1 + Subject) | Gaussian |
| *PH5a* | HR during FAT | FAT | Group * Session | (1 + Subject) | Gaussian |
| *PH5b* | HR during GUNT | GUNT | Group * Session | (1 + Subject) | Gaussian |

*Note.* FAT = Fearful Avoidance Task; MAT = Mental Arithmetic Task; GUNT = Go/NoGo Under Threat; STAI-S = State-Trait Anxiety Inventory-State; IA = interoceptive awareness.

***S4.2 Group and session effects***

**Supplementary Table 4.2** | Group and session main effects for transfer-task models

| Hypothesis | Outcome measure | Task/measure | Estimate group | 95% CrI group | Estimate session | 95% CrI session |
| --- | --- | --- | --- | --- | --- | --- |
| *H8a* | LP-HRV during FAT | FAT | -19.33 | [-26.13, -12.56] | 15.59 | [10.30, 20.92] |
| *H8b* | LP-HRV during MAT | MAT | -7.66 | [-12.57, -2.70] | 2.38 | [-0.86, 5.66] |
| *H8c* | LP-HRV during GUNT | GUNT | -18.35 | [-25.05, -11.68] | 10.74 | [5.57, 15.90] |
| *H9* | Proportion of avoidance decisions | FAT | -0.05 | [-0.41, 0.32] | 0.22 | [-0.13, 0.59] |
| *H10a* | STAI-s scores | MAT | 2.61 | [0.56, 4.66] | 1.36 | [0.21, 2.49] |
| *H10b* | Performance scores MAT | MAT | 0.23 | [-0.03, 0.49] | 0.41 | [0.26, 0.56] |
| *H10c* | HR during MAT | MAT | 2.90 | [0.51, 5.38] | -1.40 | [-2.43, -0.37] |
| *H11a* | Proportion of false alarms | GUNT | -0.15 | [-0.30, -0.01] | 0.27 | [0.09, 0.45] |
| *H11b* | Reaction time (RT) | GUNT | 1.59 | [-0.83, 4.07] | -0.05 | [-1.20, 1.10] |
| *PH5a* | HR during FAT | FAT | 1.40 | [-0.79, 3.68] | -0.14 | [-0.86, 0.59] |
| *PH5b* | HR during GUNT | GUNT | 2.04 | [0.05, 4.01] | 0.25 | [-0.51, 0.99] |

*Note.* Estimates are posterior means; 95% CrI = 95% credible interval. Negative group estimates indicate higher values in the biofeedback group (biofeedback coded as −1 in sum-to-zero coding). FAT = Fearful Avoidance Task; MAT = Mental Arithmetic Task; GUNT = Go/NoGo Under Threat.

***S4.3 Baseline LP-HRV covariate effects***

**Supplementary Table 4.3** | Baseline LP-HRV covariate effects in all HRV models

| Model | Outcome | Task/context | Bbaseline LP-HRV | 99.9% CrI |
| --- | --- | --- | --- | --- |
| H1 (P7 vs P1) | VR LP-HRV | VR training | 19.03 | [8.89, 29.23] |
| H1 (P8 vs P1) | VR LP-HRV | VR training | 18.48 | [7.09, 29.32] |
| H8a | LP-HRV during FAT | FAT | 35.46 | [24.44, 46.97] |
| H8b | LP-HRV during MAT | MAT | 22.00 | [13.70, 30.00] |
| H8c | LP-HRV during GUNT | GUNT | 29.40 | [17.90, 39.50] |

*Note.* All effects credible at the 99.9% level (CrI excluding zero). Estimates are on the LP-HRV scale (ms). FAT = Fearful Avoidance Task; MAT = Mental Arithmetic Task; GUNT = Go/NoGo Under Threat. The moderation of baseline LP-HRV on training gains (PH3: B baseline x P7_vs_P1 = 6.74, 99% CrI [0.01, 13.56]) is reported in the preregistered hypotheses table (S2/S3).

***S4.4 Heart rate group and session effects***

**Supplementary Table 4.4. |** Heart-rate transfer models for the three behavioural tasks

| Task | Effect | Estimate | SE | 95% CrI |
| --- | --- | --- | --- | --- |
| FAT | Group | 1.40 | 1.13 | [−0.79, 3.68] |
|  | Session | −0.14 | 0.50 | [−1.12, 0.87] |
|  | Group × Session | 0.33 | 0.50 | [−0.65, 1.29] |
| GUNT | Group | 2.04 | 1.01 | [0.05, 4.01] |
|  | Session | 0.25 | 0.39 | [−0.51, 1.02] |
|  | Group × Session | −0.05 | 0.39 | [−0.82, 0.70] |
| MAT | Group | 2.90 | 1.22 | [0.51, 5.38] |
|  | Session | −1.40 | 0.53 | [−2.43, −0.37] |
|  | Group × Session | 0.90 | 0.51 | [−0.13, 1.89] |

*Note.* Estimates are posterior means on the heart-rate scale (bpm); 95% CrI = 95% credible interval. FAT = Fearful Avoidance Task; GUNT = Go/NoGo Under Threat; MAT = Mental Arithmetic Task. Only the MAT showed a credible (90% CrI [0.05, 1.74]) Group × Session interaction; follow-up contrasts indicated groups did not differ at baseline (C − E = 3.97, 90% HPD [−0.39, 8.31]) but the biofeedback group had a lower heart rate at transfer (C − E = 7.55, 99% HPD [0.31, 14.60]). Descriptive HR means per task, session and group are in Supplementary Table 5.2.1.

**S5: Supplementary results**

***S5.1 Game validation and effectiveness***

**Priming effects**

To validate that the dispatch-prime manipulation biased responding in the VR shooter, we compared performance on **primed** versus **unprimed** trials within participants using signal detection theory. For each condition, we computed hit and false-alarm rates (with a log-linear correction), derived sensitivity (d′) and response criterion (c), and tested primed–unprimed differences using paired t-tests. Priming significantly increased sensitivity, *t*(415) = 42.58, *p* < .001, mean Δd′ = 1.24, 95% CI [1.18, 1.30], and shifted response bias toward a more liberal criterion (lower *c*), *t*(415) = −49.75, *p* < .001, mean Δ*c* = −0.73, 95% CI [−0.76, −0.70]. Consistent with this liberal shift, priming also increased commission errors: the percentage false alarms was significantly higher on primed (10.1%) than unprimed (8.42%) NoGo trials, *t*(415) = 4.62, *p* < .001, 95% CI [0.01, 0.03]. Together, these results indicate that dispatch priming both improved the chance to quickly detect the target and biased participants toward executing a Go response, increasing false alarms on NoGo targets.

**Supplementary Table 5.1.1** | Descriptive statistics of LP-HRV, heart rate, signal detection, false-alarm rate, interoception, and engagement across training playthroughs

| Variable | 1 | 2 | 3 | 4 | 5 | 6 | 7 | 8 |
| --- | --- | --- | --- | --- | --- | --- | --- | --- |
| Local-power HRV | 49.20 (2.59) | 78.90 (0.86) | 72.98 (4.21) | 85.15 (5.11) | 61.37 (4.79) | 78.36 (5.54) | 80.92 (5.62) | 90.47 (6.28) |
| Heart rate | 89.03 (1.52) | 87.32 (1.42) | 86.35 (1.48) | 86.75 (1.33) | 94.25 (1.85) | 92.28 (1.66) | 88.47 (1.44) | 88.27 (1.41) |
| Sensitivity*unprimed* | 1.84 (0.07) | 1.66 (0.06) | 1.72 (0.06) | 1.79 (0.07) | 1.88 (0.06) | 1.90 (0.06) | 2.15 (0.08) | 2.18 (0.07) |
| Criterion*unprimed* | 0.47 (0.03) | 0.62 (0.03) | 0.60 (0.03) | 0.51 (0.04) | 0.53 (0.04) | 0.63 (0.04) | 0.57 (0.04) | 0.52 (0.05) |
| Sensitivity*primed* | 1.89 (0.05) | 1.53 (0.06) | 1.55 (0.05) | 1.92 (0.06) | 1.98 (0.05) | 2.10 (0.06) | 2.14 (0.06) | 2.00 (0.07) |
| Criterion*primed* | 0.47 (0.03) | 0.44 (0.03) | 0.35 (0.03) | 0.48 (0.03) | 0.39 (0.03) | 0.51 (0.03) | 0.46 (0.03) | 0.45 (0.03) |
| FA-rate*overall* | 0.09 (0.01) | 0.11 (0.01) | 0.12 (0.01) | 0.09 (0.01) | 0.09 (0.01) | 0.06 (0.01) | 0.06 (0.01) | 0.07 (0.01) |
| FA-rate*dispatch-primed* | 0.08 (0.01) | 0.14 (0.01) | 0.16 (0.02) | 0.09 (0.01) | 0.09 (0.01) | 0.07 (0.01) | 0.06 (0.01) | 0.09 (0.01) |
| Interoception*breathing* | 2.15 (0.17) | 5.46 (0.13) | 5.20 (0.18) | 5.52 (0.16) | 4.83 (0.18) | 5.62 (0.13) | 5.69 (0.17) | 5.96 (0.13) |
| Interoception*heart rate* | 2.31 (0.18) | 3.35 (0.22) | 3.50 (0.23) | 3.67 (0.22) | 3.33 (0.24) | 3.92 (0.24) | 3.98 (0.25) | 4.04 (0.26) |
| Engagement | - | 6.41 (0.16) | - | 6.35 (0.15) | - | 6.35 (0.13) | - | 6.49 (0.14) |

*Note.* Values are Mean (SE). Columns 2, 4, 6, and 8 (shaded in the original manuscript) represent playthroughs with biofeedback presentation. Interoception was rated on a 7-point scale (1 = not at all aware, 7 = highly aware); engagement on a 7-point scale (1 = not true at all, 7 = very true) and was assessed after each pair of two playthroughs. SE = standard error.

**Supplementary Table 5.1.2 |** Descriptive statistics of the cognitive appraisal of the VR game

| **Cognitive appraisal item** | Biofeedback group playthrough 4 | Biofeedback group playthrough 8 | Control group playthrough 1 |
| --- | --- | --- | --- |
| *“This task was demanding”* | 4.95 (0.18) | 4.81 (0.22) | 4.82 (0.21) |
| *“This task was stressful”* | 4.78 (0.19) | 4.02 (0.22) | 4.73 (0.21) |
| *“This task was distressing”* | 3.47 (0.22) | 3.42 (0.21) | 3.61 (0.25) |
| *“This task was threatening”* | 2.84 (0.22) | 2.71 (0.19) | 3.18 (0.24) |
| *“I am uncertain how I will perform”* | 4.24 (0.21) | 3.98 (0.19) | 4.65 (0.22) |
| *“This task requires a lot of effort”* | 4.64 (0.19) | 4.58 (0.22) | 4.22 (0.23) |

*Note.* Values are Mean (SE). Participants rated each item on a 7-point Likert scale (1 = strongly disagree, 7 = strongly agree). SE = standard error.

***S5.2 Transfer***

**Supplementary Table 5.2.1** | Local-power HRV and heart rate during the behavioural task battery at baseline and transfer

| **Condition** | Baseline control group | Baseline biofeedback group | Transfer control group | Transfer biofeedback group |
| --- | --- | --- | --- | --- |
| LP-HRV FAT | 81.70 (6.68) | 85.40 (7.33) | 78.00 (5.97) | 151.00 (13.00) |
| LP-HRV MA | 74.50 (6.99) | 80.20 (5.38) | 72.90 (5.33) | 92.20 (5.95) |
| LP-HRV GUNT | 95.30 (6.11) | 110.00 (6.99) | 94.40 (6.46) | 153.00 (10.80) |
| HR FAT | 77.00 (2.34) | 76.20 (1.66) | 77.60 (1.80 | 75.20 (1.44) |
| HR MA | 88.10 (2.37) | 85.60 (1.92) | 87.40 (1.87) | 80.70 (1.68) |
| HR GUNT | 75.10 (1.89) | 71.80 (1.49) | 75.60 (1.41) | 72.60 (1.38) |

*Note.* Values are Mean (SE). FAT = Fearful Avoidance Task; MAT = Mental Arithmetic Task; GUNT = Go/NoGo Under Threat. SE = standard error.

**
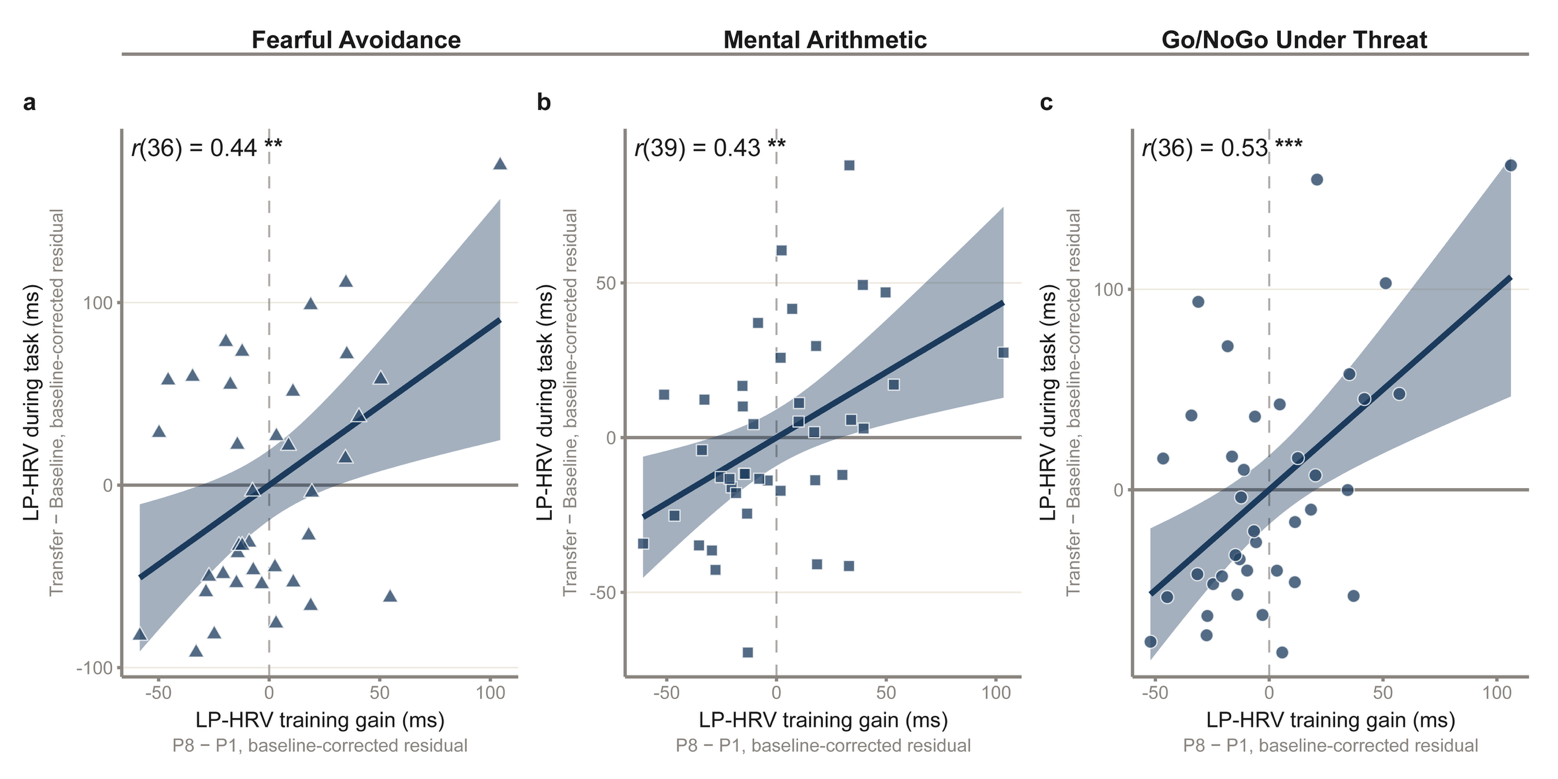
Supplementary Figure 5.2.2 |** Scatterplots displaying the baseline-corrected correlation between LP-HRV progression during VR training and during the behavioural tasks

*Note.* Baseline-corrected correlations are partial correlations between LP-HRV task-change scores and VR training progression (LP-HRV playthrough 8 − playthrough 1) controlling for baseline LP-HRV. * *p* < .05, ** *p* < .01, *** *p* < .001.

**S5.2.1 Fearful Avoidance Task**

**Supplementary Table 5.2.3 |** Average avoidance behaviour during the Fearful Avoidance Task

| Condition | Baseline control group | Baseline biofeedback group | Transfer control group | Transfer biofeedback group |
| --- | --- | --- | --- | --- |
| Low threat x high reward | 0.08 (0.03) | 0.08 (0.02) | 0.09 (0.02) | 0.06 (0.02) |
| Low threat x low reward | 0.37 (0.04) | 0.44 (0.05) | 0.40 (0.05) | 0.34 (0.04) |
| High threat x high reward | 0.23 (0.04) | 0.22 (0.04) | 0.25 (0.05) | 0.20 (0.04) |
| High threat x low reward | 0.74 (0.04) | 0.77 (0.03) | 0.75 (0.04) | 0.70 (0.05) |

*Note.* Values are Mean (SE). Values represent the mean proportion of avoidance responses in each condition of the 2 × 2 (threat × reward) design, by group (biofeedback and control) and session (baseline and transfer). SE = standard error.

**S5.2.2 Mental Arithmetic Task**

**Supplementary Table 5.2.4 |** State anxiety (STAI-S) scores surrounding the Mental Arithmetic Task

| **Condition** | Baseline control group | Baseline biofeedback group | Transfer control group | Transfer biofeedback group |
| --- | --- | --- | --- | --- |
| STAI pre | 39.30 (1.51) | 36.53 (1.60) | 40.02 (1.38) | 35.09 (1.48) |
| STAI post | 50.52 (1.86) | 45.02 (2.13) | 46.48 (1.98) | 38.98 (1.70) |
| STAIΔ (Post-Pre) | 11.22 (2.39) | 8.49 (2.66) | 6.46 (2.41) | 3.89 (2.25) |

*Note.* Values are Mean (SE). STAI-S consists of 20 items; total scores range from 20 to 80. Pre = immediately before the task; post = immediately after the task; Δ = post − pre difference score. SE = standard error.

**Supplementary Table 5.2.5 |** Mental Arithmetic Task performance: raw and z-scored

| **Condition** | Baseline control group | Baseline biofeedback group | Transfer control group | Transfer biofeedback group |
| --- | --- | --- | --- | --- |
| Performanceraw | 31.64 (3.75) | 20.17 (2.84) | 36.46 (3.86) | 31.78 (3.53) |
| Performancez-scored | 0.00 (0.14) | 0.00 (0.15) | 0.19 (0.15) | 0.60 (0.18) |

*Note.* Values are Mean (SE). Performance is the greatest streak of successive correct subtractions. Z-scores were computed within group to remove pre-existing baseline differences while preserving within-subject change. SE = standard error.

**S5.2.3 Go/No/Go Under Threat Task**

**Supplementary Table 5.2.6 |** Average false-alarm rate during the Go/NoGo Under Threat Task

| **Condition** | Baseline control group | Baseline biofeedback group | Transfer control group | Transfer biofeedback group |
| --- | --- | --- | --- | --- |
| Safe | 0.08 (0.01) | 0.12 (0.02) | 0.05 (0.01) | 0.07 (0.01) |
| Threat | 0.14 (0.02) | 0.17 (0.02) | 0.09 (0.01) | 0.12 (0.02) |

*Note*. Cells show Mean (SE). Means represent average false-alarm rate.

**Supplementary Table 5.2.7 |** Average reaction time on go trials during the Go/NoGo Under Threat Task

| **Condition** | Baseline control group | Baseline biofeedback group | Transfer control group | Transfer biofeedback group |
| --- | --- | --- | --- | --- |
| Safe | 302.02 (1.78) | 299.55 (1.62) | 304.82 (1.64) | 299.18 (1.59) |
| Threat | 297.42 (1.80) | 293.07 (1.66) | 296.71 (1.66) | 295.73 (1.64) |

*Note*. Cells show Mean (SE). Means represent reaction times on GO trials in milliseconds.

***S5.3 Long-term effects***

**Supplementary Table 5.3.1 |** Long-term outcomes: stress regulation, breathing awareness, willingness to replay, and perceived training benefits

| **Condition** | Pre-training | Post-training | 1-week follow-up | 1-month follow-up |
| --- | --- | --- | --- | --- |
| Stress regulation (1=very low; 5= very high) | *M* = 3.27, *SE* = 0.15 | *M* = 3.10, *SE* = 0.14 | *M* = 3.49, *SE* = 0.11 | *M* = 3.31, *SE* = 0.14 |
| Breathing awareness (1=very low; 5= very high) | *M* = 2.82, *SE* = 0.15 | *M* = 2.67, *SE* = 0.13 | *M* = 3.06, *SE* = 0.11 | *M* = 2.94, *SE* = 0.11 |
| Willingness to replay (1 = strongly disagree; 5 = strongly agree) |  | *M* = 4.38, *SE* = 0.11 | *M* = 4.37, *SE* = 0.12 | *M* = 4.49, *SE* = 0.11 |
| Training helped improve in stress regulation (yes/no) |  | 71.2% yes | 69.4% yes | 73.5% yes |
| Training helped improve in breathing awareness (yes/no) |  | 92.3% yes | 79.6% yes | 75.5% yes |

*Note.* Empty cells indicate questions were not asked at that timepoint

**S6 Missingness and exclusions.**

Data availability by group and measurement occasion is summarised in Table S6.1. Three participants did not attend the second day of the study due to scheduling constraints and were therefore excluded (two control, one experimental). One participant was excluded from the Fearful Avoidance Task (FAT) after meeting pre-registered task-performance criteria intended to identify invalid task understanding. Specifically, participants were excluded if they met at least one of the following criteria: (1) insufficient responding, defined as responding on fewer than 50% of trials within at least one measurement occasion; (2) disproportionate avoidance in safe relative to threat trials, defined as avoidance responses in the safe condition exceeding those in the threat condition by more than 50% of the condition-specific total trials; or (3) disproportionate avoidance in low relative to high reward trials, defined analogously as avoidance in the low-reward condition exceeding that in the high-reward condition by more than 50% of the condition-specific total trials. Application of these criteria resulted in this single FAT exclusion.

Additionally, we applied a post-hoc exclusion criterion for LP-HRV observations with excessive artifact correction, which was not preregistered. For each measurement occasion, we quantified the proportion of repeated R–R intervals (i.e., triggers of the correction algorithm) and excluded observations exceeding a measurement-specific threshold of mean + 3 SD. The average cutoff across measurement occasions was 7.65%. This resulted in the exclusion of 13 observations across 6 participants: at baseline (3 subjects), baseline-GUNT (3), baseline-FAT (2), transfer-FAT (2), baseline-MA (1), transfer-MA (1), and transfer-GUNT (1). No VR LP-HRV data were excluded by this criterion, and these exclusions did not alter any model conclusions.

**Supplementary Table 6.1 |** Data completeness by data stream, session, and group

| **Data stream** | Session | Measure | Control group | Biofeedback group |
| --- | --- | --- | --- | --- |
| Behavioural | Baseline | FAT data | 50/52 (96.2%) | 53/55 (96.4%) |
| Behavioural | Transfer | FAT data | 48/52 (92.3%) | 50/55 (90.9%) |
| Behavioural | Baseline | MAT performance | 50/52 (96.2%) | 55/55 (100.0%) |
| Behavioural | Transfer | MAT performance | 49/52 (94.2%) | 53/55 (96.4%) |
| Behavioural | Baseline | GUNT data | 49/52 (94.2%) | 54/55 (98.2%) |
| Behavioural | Transfer | GUNT data | 47/52 (90.4%) | 48/55 (87.3%) |
| Behavioural | Baseline | STAI-S scores | 48/52 (92.3%) | 45/55 (81.8%) |
| Behavioural | Transfer | STAI-S scores | 46/52 (88.5%) | 46/55 (83.6%) |
| Task LP-HRV | Baseline | FAT LP-HRV | 48/52 (92.3%) | 49/55 (89.1%) |
| Task LP-HRV | Transfer | FAT LP-HRV | 43/52 (82.7%) | 47/55 (85.5%) |
| Task LP-HRV | Baseline | MAT LP-HRV | 48/52 (92.3%) | 50/55 (90.9%) |
| Task LP-HRV | Transfer | MAT LP-HRV | 43/52 (82.7%) | 49/55 (89.1%) |
| Task LP-HRV | Baseline | GUNT LP-HRV | 47/52 (90.4%) | 49/55 (89.1%) |
| Task LP-HRV | Transfer | GUNT LP-HRV | 45/52 (86.5%) | 47/55 (85.5%) |
| Baseline LP-HRV | Baseline | Baseline LP-HRV | 49/52 (94.2%) | 49/55 (89.1%) |
| VR HRV/game data | Overall | Full protocol complete | 46/52 (88.5%) | 47/55 (85.5%) |
| VR HRV/game data | Baseline | Playthrough 1 | 46/52 (88.5%) | 52/55 (94.5%) |
| VR HRV/game data | Transfer | Playthrough 8 | — | 50/55 (90.9%) |
| Questionnaires | Transfer | Control group questionnaire | 50/52 (96.2%) | — |
| Questionnaires | Baseline | Biofeedback group questionnaires | — | 55/55 (100.0%) |
| Questionnaires | Transfer | Biofeedback group questionnaires | — | 51/55 (92.7%) |
| Questionnaires | Follow-up 1 -week | Biofeedback group questionnaires | — | 49/55 (89.1%) |
| Questionnaires | Follow-up 1-month | Biofeedback group questionnaires | — | 49/55 (89.1%) |

*Note.* Cells report available cases as *n/N* (%). Em dashes indicate not applicable or not collected for that group/occasion. FAT = Fearful Avoidance Task; MAT = Mental Arithmetic Task; GUNT = Go/NoGo Under Threat; STAI-S = State-Trait Anxiety Inventory-State.
